# Supplementary material
Source: PubMed Central journal article supplement (PMC11010621)
Supplement: mmc1.pdf [file mmc1.pdf]

# **Capacity for the management of kidney failure in the International Society of Nephrology Africa region: Report from the 2023 ISN Global Kidney Health Atlas (ISN-GKHA)**

## **Supplementary Table and Figures**

**Table S1.** Burden of chronic kidney disease risk factors in countries of the ISN Africa region.

**Figure S1.** Workforce shortages for medical kidney care in the ISN Africa region.

**Figure S2.** Outcomes (hospitalization and death) in people on dialysis in the ISN Africa region: (A) Proportion of people living with kidney failure on hemodialysis and die in the first-year; (B) Proportion of people living with kidney failure on peritoneal dialysis and die in the first-year; (C) Proportion of people living with kidney failure on hemodialysis and at least 1 hospitalization in the first-year; (D) Proportion of people living with kidney failure on peritoneal dialysis and at least 1 hospitalization in the first-year.

**Figure S3.** Barriers to optimum kidney failure care, globally and in the ISN Africa region.

**Figure S4.** Strategies for advocacy efforts, globally and in the ISN Africa region: (A) National NCD strategy, (% of total number of countries responded); (B) National strategy for improved care, (% of total number of countries responded); (C) Population covered by national CKD specific strategy (% of total number countries responded 'Yes' in (B)), and general NCD strategy (% of total number countries responded 'Yes, but incorporated in NCD strategy' in (B)); (D) National advocacy for CKD.

**Table S1.** Burden of chronic kidney disease risk factors in the ISN Africa region.<sup>40</sup>

| Country              | Obesity<br>% (95% CI) | Increased BP<br>% (95% CI) | Smoking<br>% (95% CI) |
|----------------------|-----------------------|----------------------------|-----------------------|
| Global, median [IQR] | 21.9 [7.8-26.6]       | 24.8 [20.8-28.5]           | 13.1 [7.8-20.1]       |
| Africa, median [IQR] | 7.7 [5.8-12.2]        | 28.4 [26.7-29.8]           | 6.3 [4.7-8.8]         |
| Algeria              | 26.6 (21.7 - 32.0)    | 25.1 (19.4 - 31.5)         | 10.3 (8.4 - 12.5)     |
| Angola               | 6.80 (4.20 - 10.3)    | 29.7 (22.1 - 38.3)         | 6.7 (5.6 - 8.0)       |
| Benin                | 8.20 (6.00 - 10.8)    | 27.7 (21.7 - 34.2)         | 4.1 (3.30 - 5.0)      |
| Botswana             | 16.1 (12.3 - 20.3)    | 29.6 (23.4 - 36.4)         | 11.1 (9.40 - 13.0)    |
| Burkina Faso         | 4.50 (3.10 - 6.30)    | 32.6 (25.3 - 40.1)         | 7.5 (5.90 - 9.5)      |
| Burundi              | 4.40 (2.80 - 6.60)    | 29.2 (22.0 - 37.7)         | 4.7 (3.70 - 5.8)      |
| Cabo Verde           | 10.6 (7.50 - 14.0)    | 29.5 (22.6 - 36.8)         | 5.6 (4.30 - 7.1)      |
| Cameroon             | 9.50 (7.10 - 12.2)    | 24.8 (18.8 - 31.8)         | 4.4 (3.60 - 5.3)      |
| Chad                 | 4.80 (3.30 - 6.80)    | 32.9 (25.7 - 40.6)         | 5.2 (4.1 - 6.5)       |
| Congo, Dem. Rep.     | 5.60 (3.70 - 8.00)    | 28.5 (21.1 - 36.5)         | 6.3 (5.5 - 7.3)       |
| Congo, Rep.          | 8.40 (5.80 - 11.5)    | 26.2 (19.1 - 34.3)         | 5.5 (4.6 - 6.7)       |
| Cote d'Ivoire        | 9.00 (6.70 - 11.9)    | 27.2 (20.7 - 34.2)         | 7.3 (6.1 - 8.7)       |
| Djibouti             | 12.2 (8.60 - 16.7)    | 26.8 (19.5 - 35.0)         | 11.4 (9.5 - 13.5)     |
| Egypt                | 31.1 (26.7 - 35.5)    | 25.0 (19.8 - 30.6)         | 16.0 (14.4 - 17.8)    |
| Eritrea              | 4.10 (2.60 - 6.00)    | 29.1 (22.3 - 36.3)         | 5.1 (4.0 - 6.4)       |
| Ethiopia             | 3.60 (2.30 - 5.20)    | 30.3 (23.1 - 38.0)         | 3.1 (2.4 - 3.8)       |
| Gabon                | 13.4 (9.50 - 18.1)    | 25.5 (18.4 - 33.7)         | 8.3 (7.0 - 9.8)       |
| Gambia               | 8.70 (6.30 - 11.6)    | 29.1 (22.5 - 36.4)         | 8.9 (7.4 - 10.4)      |
| Ghana                | 9.70 (7.50 - 12.2)    | 23.7 (18.7 - 29.3)         | 2.5 (2.0 - 3.1)       |
| Guinea               | 6.60 (4.60 - 8.90)    | 30.3 (23.7 - 37.4)         | 3.8 (2.9 - 4.8)       |
| Kenya                | 6.00 (4.30 - 8.20)    | 26.7 (20.2 - 34.0)         | 6.7 (6.5 - 7.0)       |
| Liberia              | 8.60 (6.20 - 11.4)    | 28.3 (22.2 - 35.2)         | 4.5 (3.8 - 5.4)       |
| Libya                | 31.8 (26.5 - 37.4)    | 23.7 (18.0 - 29.8)         | 13.0 (11.3 - 15.0)    |
| Madagascar           | 4.50 (2.90 - 6.40)    | 28.1 (21.4 - 35.4)         | 9.2 (7.6 - 11.0)      |
| Malawi               | 4.70 (3.20 - 6.50)    | 28.9 (22.1 - 36.3)         | 6.1 (5.1 - 7.3)       |
| Mali                 | 7.10 (5.10 - 9.60)    | 32.6 (25.4 - 40.4)         | 4.9 (4.10 - 6.0)      |
| Mauritania           | 11.3 (8.30 - 14.9)    | 31.7 (24.3 - 40.0)         | 8.5 (6.7 - 10.8)      |
| Mauritius            | 11.5 (8.4 - 15.2)     | 25.0 (18.9 - 31.9)         | 15.8 (13.6 - 18.2)    |
| Morocco              | 25.6 (20.7 - 30.9)    | 26.1 (20.0 - 32.9)         | 8.3 (6.8 - 10.0)      |
| Mozambique           | 6.00 (4.10 - 8.20)    | 29.1 (22.2 - 36.6)         | 7.8 (6.5 - 9.3)       |
| Namibia              | 15.0 (11.5 - 18.7)    | 28.5 (22.3 - 35.0)         | 10.4 (8.9 - 12.2)     |
| Niger                | 4.70 (3.20 - 6.70)    | 33.4 (25.9 - 41.4)         | 4.0 (3.2 - 4.9)       |
| Nigeria              | 7.80 (5.90 - 9.90)    | 23.9 (18.7 - 29.5)         | 2.9 (2.3 - 3.6)       |
| Rwanda               | 4.80 (3.20 - 6.70)    | 26.7 (19.7 - 34.3)         | 6.3 (5.3 - 7.4)       |

| Country      | Obesity<br>% (95% CI) | Increased BP<br>% (95% CI) | Smoking<br>% (95% CI) |
|--------------|-----------------------|----------------------------|-----------------------|
| Senegal      | 7.40 (5.20 - 9.90)    | 30.2 (23.0 - 38.0)         | 4.4 (3.7 - 5.3)       |
| Sierra Leone | 7.50 (5.30 - 10.1)    | 30.3 (23.4 - 37.2)         | 10.9 (9.3 - 12.8)     |
| Somalia      | 6.90 (4.50 - 9.80)    | 32.9 (25.2 - 41.3)         | 6.0 (4.9 - 7.5)       |
| South Africa | 27.0 (23.4 - 30.8)    | 26.9 (21.7 - 32.7)         | 14.6 (13.9 - 15.3)    |
| Sudan        | -                     | -                          | 1.0 (0.7 - 1.5)       |
| Swaziland    | 13.5 (10.0 - 17.5)    | 29.8 (23.3 - 37.0)         | 4.7 (4.0 - 5.5)       |
| Tanzania     | 7.10 (5.30 - 9.40)    | 27.3 (21.4 - 33.8)         | 6.9 (5.9 - 8.0)       |
| Togo         | 7.10 (4.90 - 9.70)    | 28.9 (22.4 - 35.8)         | 3.9 (3.2 - 4.7)       |
| Tunisia      | 27.3 (22.4 - 32.1)    | 23.2 (17.7 - 29.0)         | 19.9 (17.3 - 22.7)    |
| Uganda       | 4.10 (2.80 - 5.80)    | 27.3 (21.0 - 34.2)         | 5.2 (4.4 - 6.2)       |
| Zambia       | 6.50 (4.60 - 8.80)    | 27.1 (20.8 - 34.1)         | 6.5 (5.2 - 8.0)       |
| Zimbabwe     | 12.3 (9.40 - 15.6)    | 28.2 (21.6 - 35.7)         | 8.8 (7.9 - 9.9)       |

Abbreviations: ISN, International Society of Nephrology; CKD, chronic kidney disease; CI, confidence interval; DALYs, disability-adjusted life years; BP, blood pressure; Rep, Republic; Dem. Rep., Democratic Republic; IQR, interquartile range.

**Figure S1.** Workforce shortages for medical kidney care in the ISN Africa region.

| Country              | Nephrologists | Pediatric nephrologists | Transplant surgeons | Surgeons or Interventional | Surgeons or Interventional | Dietitians | Laboratory technicians | Radiologists (ultrasounds) | Vascular access coordinators | Counsellors/psychologists | Transplant coordinators | Dialysis nurses | Renal nurses | Dialysis technicians | Social workers | Palliative care physicians | Kidney supportive care nurses | Total shortage |
|----------------------|---------------|-------------------------|---------------------|----------------------------|----------------------------|------------|------------------------|----------------------------|------------------------------|---------------------------|-------------------------|-----------------|--------------|----------------------|----------------|----------------------------|-------------------------------|----------------|
| Total                | 35            | 40                      | 36                  | 36                         | 35                         | 33         | 8                      | 11                         | 34                           | 27                        | 31                      | 26              | 26           | 27                   | 24             | 35                         | 35                            |                |
| Angola               |               |                         |                     |                            |                            |            |                        |                            |                              |                           |                         |                 |              |                      |                |                            |                               | 4              |
| Benin                |               |                         |                     |                            |                            |            |                        |                            |                              |                           |                         |                 |              |                      |                |                            |                               | 14             |
| Botswana             |               |                         |                     |                            |                            |            |                        |                            |                              |                           |                         |                 |              |                      |                |                            |                               | 15             |
| Burkina Faso         |               |                         |                     |                            |                            |            |                        |                            |                              |                           |                         |                 |              |                      |                |                            |                               | 9              |
| Burundi              |               |                         |                     |                            |                            |            |                        |                            |                              |                           |                         |                 |              |                      |                |                            |                               | 14             |
| Cabo Verde           |               |                         |                     |                            |                            |            |                        |                            |                              |                           |                         |                 |              |                      |                |                            |                               | 7              |
| Cameroon             |               |                         |                     |                            |                            |            |                        |                            |                              |                           |                         |                 |              |                      |                |                            |                               | 17             |
| Central African Rep. |               |                         |                     |                            |                            |            |                        |                            |                              |                           |                         |                 |              |                      |                |                            |                               | 16             |
| Chad                 |               |                         |                     |                            |                            |            |                        |                            |                              |                           |                         |                 |              |                      |                |                            |                               | 15             |
| Congo, Dem. Rep.     |               |                         |                     |                            |                            |            |                        |                            |                              |                           |                         |                 |              |                      |                |                            |                               | 14             |
| Congo, Rep.          |               |                         |                     |                            |                            |            |                        |                            |                              |                           |                         |                 |              |                      |                |                            |                               | 16             |
| Cote d'Ivoire        |               |                         |                     |                            |                            |            |                        |                            |                              |                           |                         |                 |              |                      |                |                            |                               | 12             |
| Egypt                |               |                         |                     |                            |                            |            |                        |                            |                              |                           |                         |                 |              |                      |                |                            |                               | 12             |
| Ethiopia             |               |                         |                     |                            |                            |            |                        |                            |                              |                           |                         |                 |              |                      |                |                            |                               | 11             |
| Gabon                |               |                         |                     |                            |                            |            |                        |                            |                              |                           |                         |                 |              |                      |                |                            |                               | 11             |
| Gambia               |               |                         |                     |                            |                            |            |                        |                            |                              |                           |                         |                 |              |                      |                |                            |                               | 14             |
| Ghana                |               |                         |                     |                            |                            |            |                        |                            |                              |                           |                         |                 |              |                      |                |                            |                               | 17             |
| Guinea               |               |                         |                     |                            |                            |            |                        |                            |                              |                           |                         |                 |              |                      |                |                            |                               | 9              |
| Kenya                |               |                         |                     |                            |                            |            |                        |                            |                              |                           |                         |                 |              |                      |                |                            |                               | 16             |
| Lesotho              |               |                         |                     |                            |                            |            |                        |                            |                              |                           |                         |                 |              |                      |                |                            |                               | 2              |
| Madagascar           |               |                         |                     |                            |                            |            |                        |                            |                              |                           |                         |                 |              |                      |                |                            |                               | 11             |
| Malawi               |               |                         |                     |                            |                            |            |                        |                            |                              |                           |                         |                 |              |                      |                |                            |                               | 16             |
| Mali                 |               |                         |                     |                            |                            |            |                        |                            |                              |                           |                         |                 |              |                      |                |                            |                               | 16             |
| Mauritania           |               |                         |                     |                            |                            |            |                        |                            |                              |                           |                         |                 |              |                      |                |                            |                               | 15             |
| Mauritius            |               |                         |                     |                            |                            |            |                        |                            |                              |                           |                         |                 |              |                      |                |                            |                               | 15             |
| Morocco              |               |                         |                     |                            |                            |            |                        |                            |                              |                           |                         |                 |              |                      |                |                            |                               | 3              |
| Mozambique           |               |                         |                     |                            |                            |            |                        |                            |                              |                           |                         |                 |              |                      |                |                            |                               | 14             |
| Namibia              |               |                         |                     |                            |                            |            |                        |                            |                              |                           |                         |                 |              |                      |                |                            |                               | 12             |
| Niger                |               |                         |                     |                            |                            |            |                        |                            |                              |                           |                         |                 |              |                      |                |                            |                               | 15             |
| Nigeria              |               |                         |                     |                            |                            |            |                        |                            |                              |                           |                         |                 |              |                      |                |                            |                               | 13             |
| Senegal              |               |                         |                     |                            |                            |            |                        |                            |                              |                           |                         |                 |              |                      |                |                            |                               | 16             |
| Somalia              |               |                         |                     |                            |                            |            |                        |                            |                              |                           |                         |                 |              |                      |                |                            |                               | 7              |
| South Africa         |               |                         |                     |                            |                            |            |                        |                            |                              |                           |                         |                 |              |                      |                |                            |                               | 14             |
| Sudan                |               |                         |                     |                            |                            |            |                        |                            |                              |                           |                         |                 |              |                      |                |                            |                               | 7              |
| Swaziland            |               |                         |                     |                            |                            |            |                        |                            |                              |                           |                         |                 |              |                      |                |                            |                               | 16             |
| Tanzania             |               |                         |                     |                            |                            |            |                        |                            |                              |                           |                         |                 |              |                      |                |                            |                               | 13             |
| Togo                 |               |                         |                     |                            |                            |            |                        |                            |                              |                           |                         |                 |              |                      |                |                            |                               | 14             |
| Tunisia              |               |                         |                     |                            |                            |            |                        |                            |                              |                           |                         |                 |              |                      |                |                            |                               | 5              |
| Uganda               |               |                         |                     |                            |                            |            |                        |                            |                              |                           |                         |                 |              |                      |                |                            |                               | 11             |
| Zambia               |               |                         |                     |                            |                            |            |                        |                            |                              |                           |                         |                 |              |                      |                |                            |                               | 11             |
| Zimbabwe             |               |                         |                     |                            |                            |            |                        |                            |                              |                           |                         |                 |              |                      |                |                            |                               | 10             |

ISN, International Society of Nephrology; Rep., Republic; Dem. Rep., Democratic Republic; HD, hemodialysis; PD, peritoneal dialysis, Rep., Republic

■ No shortage ■ Shortage ■ Unknown

**Figure S2.** Outcomes (hospitalization and death) in people on dialysis in the ISN Africa region: (A) Proportion of people living with kidney failure on hemodialysis and die in the first-year; (B) Proportion of people living with kidney failure on peritoneal dialysis and die in the first-year; (C) Proportion of people living with kidney failure on hemodialysis and at least 1 hospitalization in the first-year; (D) Proportion of people living with kidney failure on peritoneal dialysis and at least 1 hospitalization in the first-year.\*

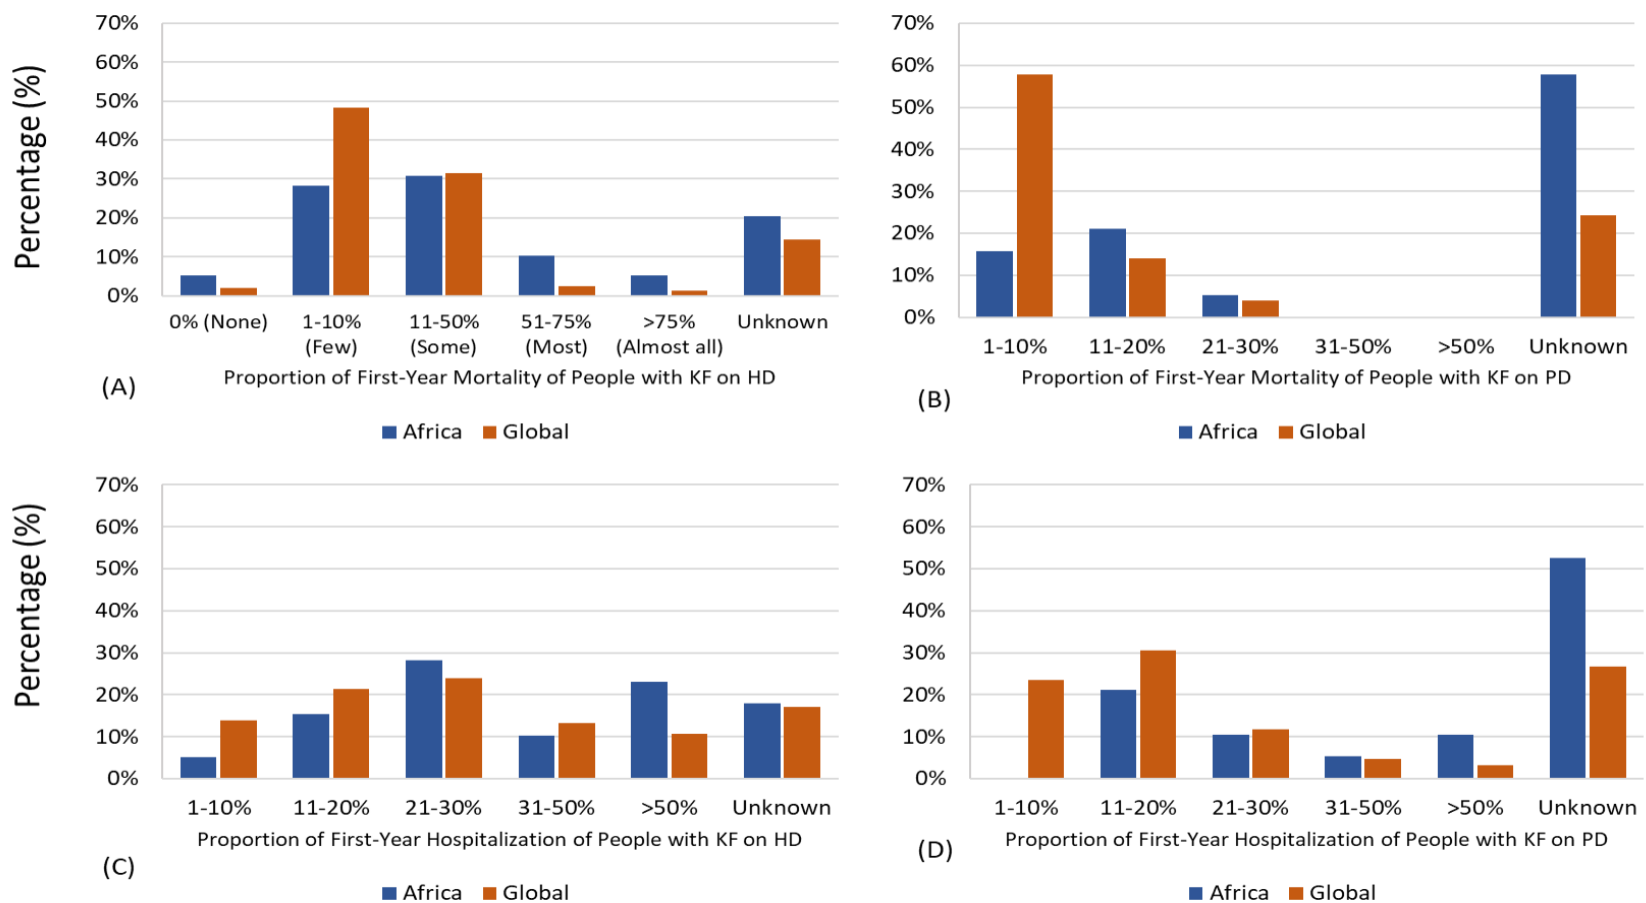

Abbreviations: ISN, International Society of Nephrology; HD, hemodialysis; PD, peritoneal dialysis; KF, kidney failure

\*Values represent absolute number of countries in each category expressed as a percentage of total number of countries

**Figure S3.** Barriers to optimum kidney failure care, globally and in the ISN Africa region.\*

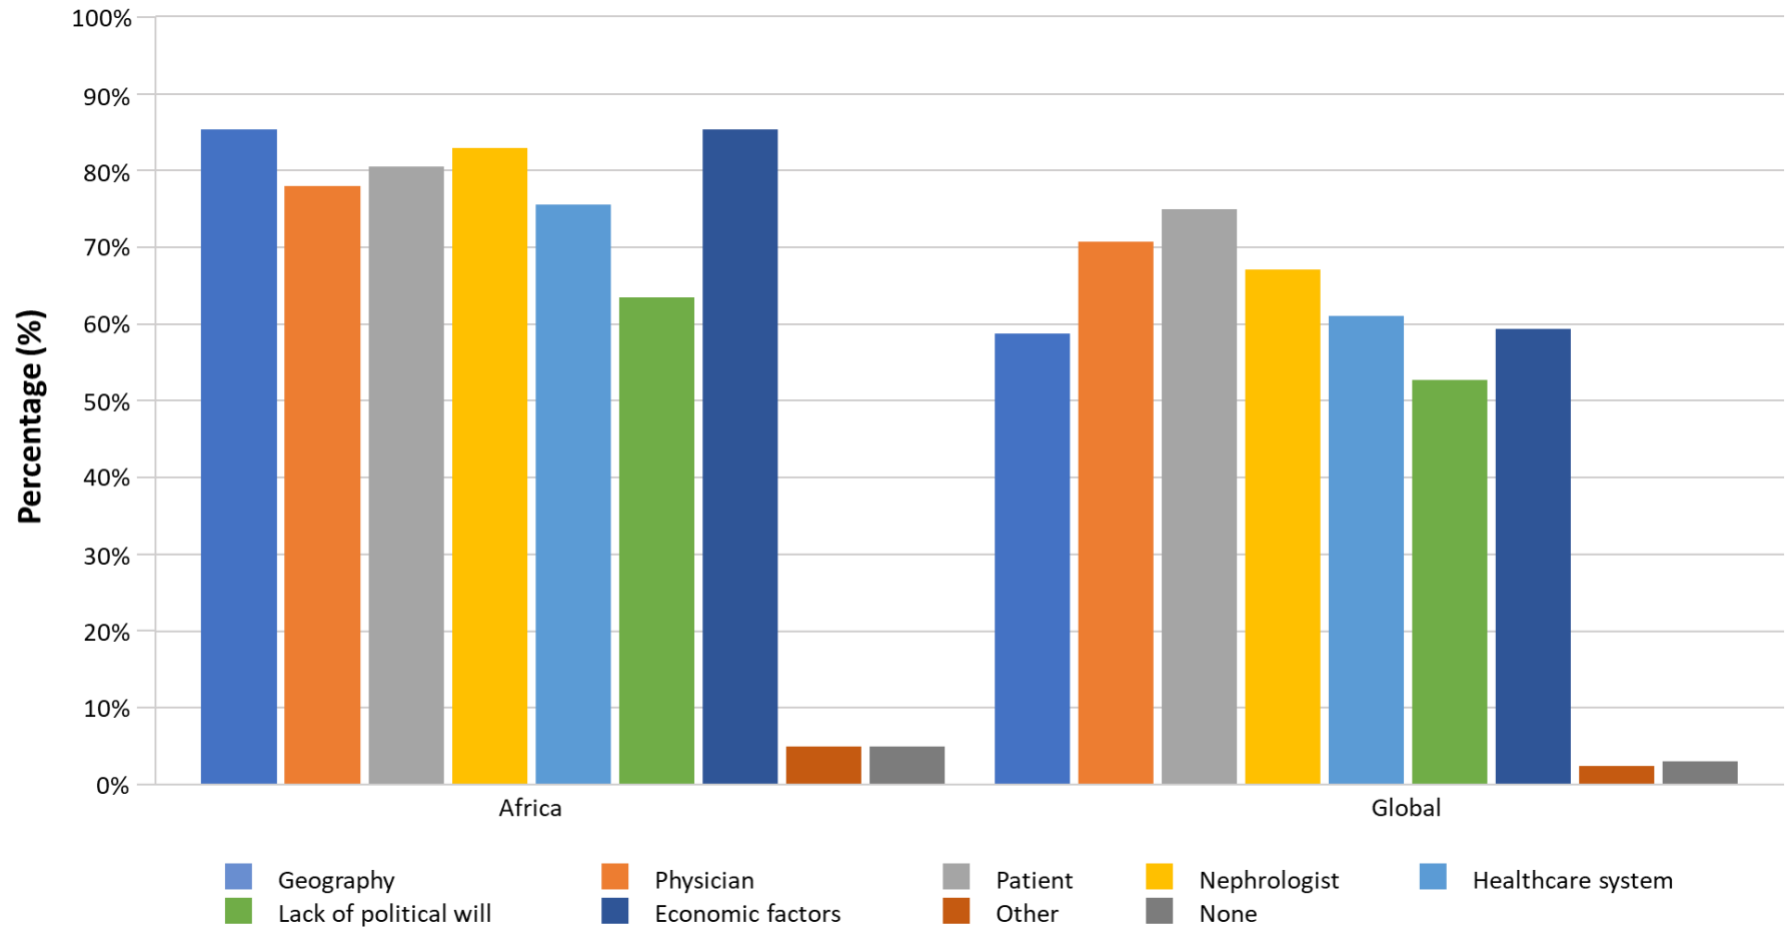

Abbreviations: ISN, International Society of Nephrology

\*Values represent the absolute number of countries in each category expressed as a percentage of total number of countries

**Figure S4.** Strategies for advocacy efforts, globally and in the ISN Africa region: (A) National NCD strategy, (% of total number of countries responded); (B) National strategy for improved care, (% of total number of countries responded); (C) Population covered by national CKD specific strategy (% of total number countries responded 'Yes' in (B)), and general NCD strategy (% of total number countries responded 'Yes, but incorporated in NCD strategy' in (B)); (D) National advocacy for CKD.\*

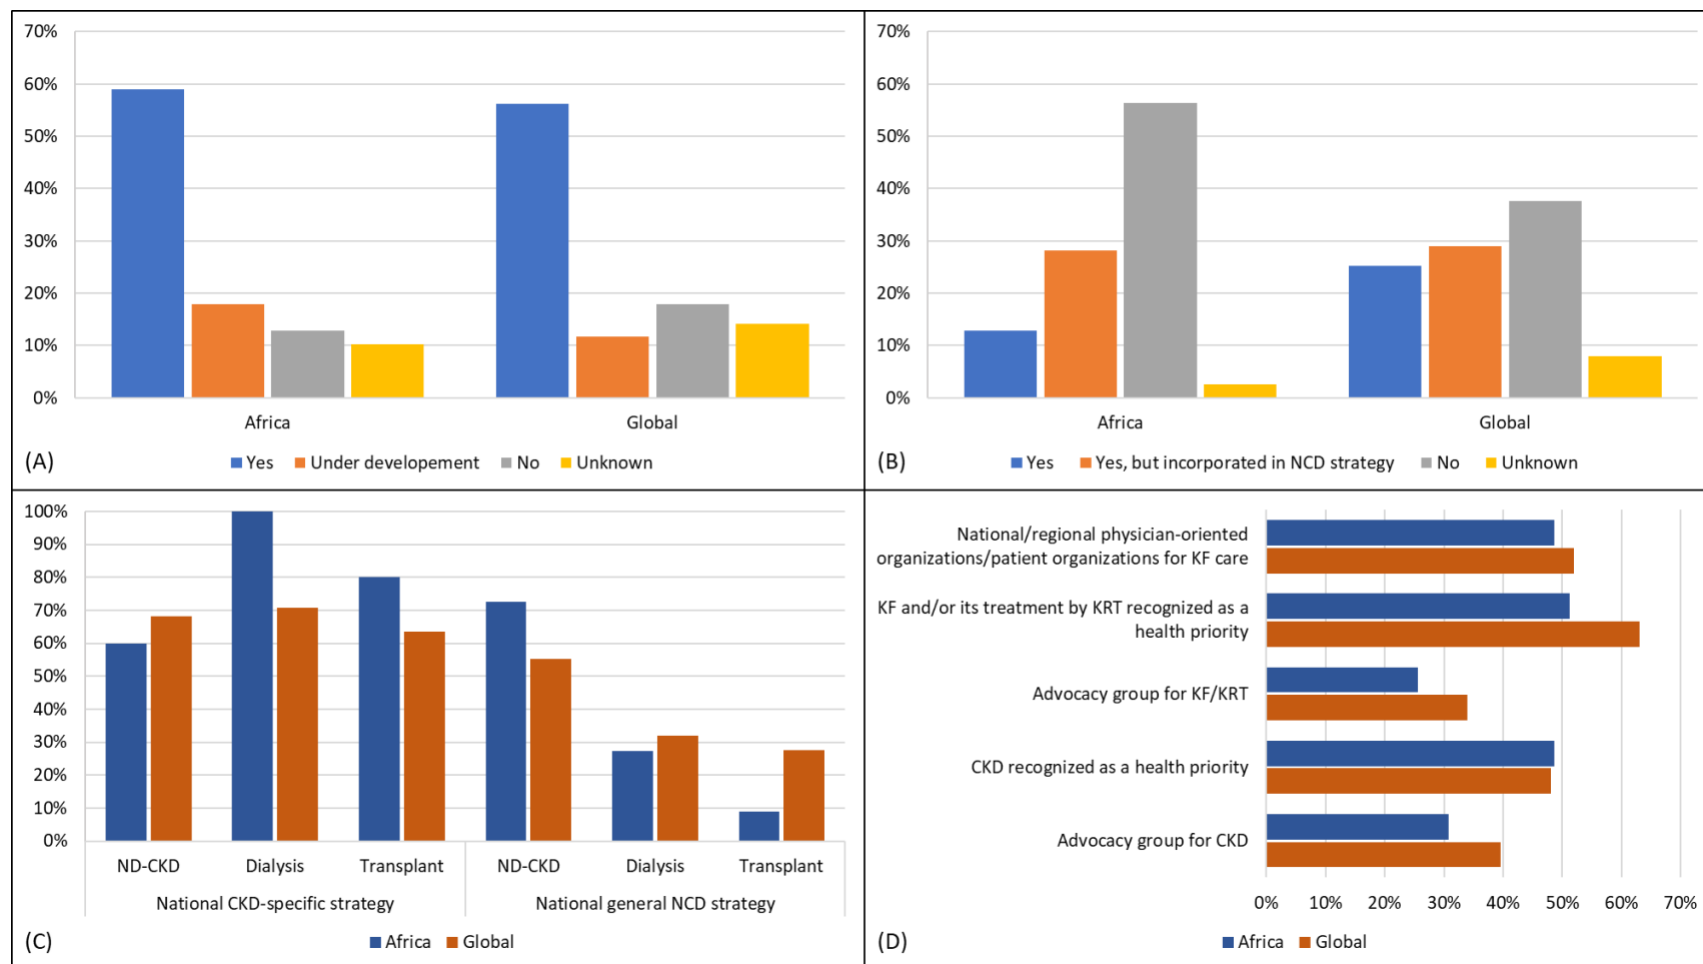

Abbreviations: ISN, International Society of Nephrology; NCD, non-communicable diseases; CKD, chronic kidney disease; KF, kidney failure; KRT, kidney replacement treatment; ND, non-dialysis  
 \*Values represent absolute number of countries in each category expressed as a percentage of total number of countries
